# Supplementary material for: Mature parvalbumin interneuron function in prefrontal cortex requires activity during a postnatal sensitive period
Source: eLife. 2022 Dec 28;11:e80324. doi: 10.7554/eLife.80324 (PMC9797185; doi:10.7554/eLife.80324)
Supplement: Figure 1—source data 1. [file elife-80324-fig1-data1.xlsx]

## Sheet: RMP
Age	Virus	Delta RMP
P35	hM4D	-5.28
P35	hM4D	-3.85
P35	hM4D	-1.19
P35	hM4D	-5.22
P35	hM4D	-3.81
P35	hM4D	-4.4
P35	hM4D	-4.18
P115	hM4D	-4.12
P115	hM4D	-4.88
P115	hM4D	-1.61
P115	hM4D	0.21
P115	hM4D	-15.44
P115	hM4D	-3.45
P35	mCherry	-4.39
P35	mCherry	1.28
P35	mCherry	-0.54
P35	mCherry	-0.58
P35	mCherry	-0.22
P115	mCherry	2.41
P115	mCherry	-0.64
P115	mCherry	1.62
