# Supplementary material for: Mature parvalbumin interneuron function in prefrontal cortex requires activity during a postnatal sensitive period
Source: eLife. 2022 Dec 28;11:e80324. doi: 10.7554/eLife.80324 (PMC9797185; doi:10.7554/eLife.80324)
Supplement: Figure 2—source data 1. [file elife-80324-fig2-data1.xlsx]

## Sheet: IA
	Treatment Group	IA - Trials to Criterion	IA - Latency
	dev inhibition	13	48.6796
	dev inhibition	11	19.4039
	dev inhibition	21	10.337
	dev inhibition	11	40.5327
	dev inhibition	10	14.987
	dev control	17	126.179
	dev control	9	96.3446
	dev control	10	19.6366
	dev control	13	12.4282
	dev control	18	11.3232
	dev control	15	16.6482
	dev control	14	16.6281
	dev control	10	15.3855

## Sheet: ED Set-Shifting
	Treatment Group	SS - Trials to Criterion	SS - Errors	SS - Per Errors	SS - Random Errors	SS - Latency
	dev inhibition	24	9	44.4444	55.5556	73.8302
	dev inhibition	27	10	50	50	38.0373
	dev inhibition	20	8	37.5	62.5	8.7887
	dev inhibition	13	4	75	25	18.4347
	dev inhibition	18	8	50	50	60.6703
	dev control	9	1	100	0	53.1194
	dev control	10	2	0	100	68.3679
	dev control	8	0	N/A	N/A	44.8732
	dev control	12	3	66.6667	33.3333	15.0324
	dev control	14	5	40	60	14.4943
	dev control	10	2	100	0	92.7253
	dev control	17	5	60	40	28.3963
	dev control	8	0	N/A	N/A	17.07
