# Supplementary material for: Mature parvalbumin interneuron function in prefrontal cortex requires activity during a postnatal sensitive period
Source: eLife. 2022 Dec 28;11:e80324. doi: 10.7554/eLife.80324 (PMC9797185; doi:10.7554/eLife.80324)
Supplement: Figure 2—source data 2. [file elife-80324-fig2-data2.xlsx]

## Sheet: Sheet1
Gamma	Animal	Trial Type
0.175525	A	Baseline
0.188482	A	Baseline
0.169803	A	Baseline
0.167255	A	Baseline
0.167146	A	Baseline
0.169027	A	Baseline
0.188657	A	Baseline
0.186061	B	Baseline
0.178824	B	Baseline
0.186728	B	Baseline
0.231187	B	Baseline
0.214042	B	Baseline
0.175348	B	Baseline
0.191975	B	Baseline
0.195448	B	Baseline
0.203792	B	Baseline
0.192289	B	Baseline
0.171695	B	Baseline
0.213963	B	Baseline
0.248594	C	Baseline
0.226887	C	Baseline
0.228585	C	Baseline
0.218458	C	Baseline
0.24884	C	Baseline
0.212412	C	Baseline
0.221303	C	Baseline
0.226	C	Baseline
0.185299	C	Baseline
0.277989	D	Baseline
0.26879	D	Baseline
0.283359	D	Baseline
0.238609	D	Baseline
0.290438	D	Baseline
0.243728	D	Baseline
0.253922	D	Baseline
0.271557	D	Baseline
0.275672	D	Baseline
0.276913	D	Baseline
0.219581	D	Baseline
0.259087	D	Baseline
0.293997	D	Baseline
0.320177	D	Baseline
0.293116	D	Baseline
0.252345	D	Baseline
0.221889	D	Baseline
0.215307	E	Baseline
0.213692	E	Baseline
0.259437	E	Baseline
0.217683	E	Baseline
0.232159	E	Baseline
0.207793	E	Baseline
0.202157	E	Baseline
0.22732	E	Baseline
0.227516	F	Baseline
0.256739	F	Baseline
0.247129	F	Baseline
0.229571	F	Baseline
0.245587	F	Baseline
0.221517	F	Baseline
0.219863	F	Baseline
0.201397	F	Baseline
0.177732	G	Baseline
0.157979	G	Baseline
0.196251	G	Baseline
0.16707	G	Baseline
0.190897	G	Baseline
0.184869	G	Baseline
0.218782	G	Baseline
0.186941	G	Baseline
0.19157	G	Baseline
0.324869	H	Baseline
0.299876	H	Baseline
0.249972	H	Baseline
0.263276	H	Baseline
0.240469	H	Baseline
0.282925	H	Baseline
0.282041	H	Baseline
0.24357	H	Baseline
0.323449	H	Baseline
0.187346	A	Correct
0.164848	A	Incorrect
0.146272	A	Incorrect
0.209388	A	Correct
0.174013	A	Correct
0.176441	A	Incorrect
0.197532	A	Correct
0.324206	B	Correct
0.188897	B	Incorrect
0.15555	B	Incorrect
0.211022	B	Incorrect
0.304974	B	Correct
0.337361	B	Correct
0.338552	B	Correct
0.253776	B	Correct
0.189595	B	Incorrect
0.19268	B	Incorrect
0.24414	B	Correct
0.296799	B	Correct
0.249508	C	Incorrect
0.294722	C	Correct
0.305005	C	Correct
0.302744	C	Correct
0.276732	C	Correct
0.261218	C	Correct
0.291515	C	Correct
0.314974	C	Correct
0.346382	C	Correct
0.272268	D	Incorrect
0.265763	D	Correct
0.276789	D	Correct
0.35745	D	Correct
0.338283	D	Correct
0.247417	D	Incorrect
0.260848	D	Incorrect
0.356526	D	Correct
0.261481	D	Incorrect
0.323329	D	Correct
0.306615	D	Correct
0.327426	D	Correct
0.34484	D	Correct
0.309825	D	Correct
0.242195	D	Incorrect
0.43257	D	Correct
0.251226	D	Correct
0.236202	E	Correct
0.229196	E	Correct
0.234218	E	Correct
0.203335	E	Correct
0.216062	E	Correct
0.26655	E	Correct
0.233311	E	Correct
0.22373	E	Correct
0.374231	F	Correct
0.341649	F	Correct
0.307957	F	Correct
0.362728	F	Correct
0.366322	F	Correct
0.302448	F	Correct
0.352409	F	Correct
0.294993	F	Correct
0.216312	G	Correct
0.216937	G	Correct
0.226261	G	Correct
0.239574	G	Correct
0.22442	G	Incorrect
0.203606	G	Correct
0.307547	G	Correct
0.205413	G	Correct
0.218839	G	Correct
0.312263	H	Correct
0.316178	H	Correct
0.290688	H	Correct
0.26801	H	Incorrect
0.300872	H	Correct
0.257167	H	Incorrect
0.301226	H	Correct
0.373283	H	Correct
0.303507	H	Correct
