# Supplementary material for: Mature parvalbumin interneuron function in prefrontal cortex requires activity during a postnatal sensitive period
Source: eLife. 2022 Dec 28;11:e80324. doi: 10.7554/eLife.80324 (PMC9797185; doi:10.7554/eLife.80324)
Supplement: Figure 2—source data 3. [file elife-80324-fig2-data3.xlsx]

## Sheet: Sheet1
Gamma	Animal	Trial Type
0.165683	I	Baseline
0.144132	I	Baseline
0.141943	I	Baseline
0.123361	I	Baseline
0.16198	I	Baseline
0.14413	I	Baseline
0.147431	I	Baseline
0.13905	I	Baseline
0.152967	I	Baseline
0.168259	I	Baseline
0.151593	I	Baseline
0.177572	I	Baseline
0.144791	I	Baseline
0.168562	I	Baseline
0.152907	I	Baseline
0.264918	J	Baseline
0.307283	J	Baseline
0.320958	J	Baseline
0.27177	J	Baseline
0.263762	J	Baseline
0.291567	J	Baseline
0.282082	J	Baseline
0.298628	J	Baseline
0.281418	J	Baseline
0.290939	J	Baseline
0.265361	J	Baseline
0.283322	J	Baseline
0.28419	J	Baseline
0.268902	K	Baseline
0.243844	K	Baseline
0.252232	K	Baseline
0.235834	K	Baseline
0.285164	K	Baseline
0.254041	K	Baseline
0.246335	K	Baseline
0.28743	K	Baseline
0.259929	K	Baseline
0.248954	K	Baseline
0.242677	K	Baseline
0.251547	K	Baseline
0.260461	K	Baseline
0.280363	K	Baseline
0.254832	K	Baseline
0.250673	K	Baseline
0.274746	K	Baseline
0.266638	K	Baseline
0.281399	K	Baseline
0.306825	K	Baseline
0.274167	K	Baseline
0.292497	K	Baseline
0.310025	K	Baseline
0.2342	L	Baseline
0.241197	L	Baseline
0.252124	L	Baseline
0.238	L	Baseline
0.186288	L	Baseline
0.229726	L	Baseline
0.22034	L	Baseline
0.226253	L	Baseline
0.216313	L	Baseline
0.21065	L	Baseline
0.219057	L	Baseline
0.211516	L	Baseline
0.230986	L	Baseline
0.211845	L	Baseline
0.243276	L	Baseline
0.2473	L	Baseline
0.222553	L	Baseline
0.200805	L	Baseline
0.158289	I	Incorrect
0.160321	I	Incorrect
0.17064	I	Correct
0.16	I	Incorrect
0.188684	I	Correct
0.152197	I	Incorrect
0.175942	I	Correct
0.149842	I	Incorrect
0.179628	I	Incorrect
0.171585	I	Incorrect
0.15234	I	Incorrect
0.182923	I	Correct
0.179414	I	Correct
0.184496	I	Correct
0.163458	I	Correct
0.248251	J	Correct
0.258065	J	Incorrect
0.250465	J	Incorrect
0.249792	J	Correct
0.1966	J	Correct
0.224382	J	Correct
0.250747	J	Correct
0.245624	J	Incorrect
0.228624	J	Correct
0.220071	J	Correct
0.213995	J	Incorrect
0.260773	J	Correct
0.24829	J	Correct
0.221365	K	Incorrect
0.356461	K	Correct
0.243203	K	Correct
0.285202	K	Correct
0.268049	K	Correct
0.240203	K	Incorrect
0.314864	K	Correct
0.344127	K	Correct
0.269555	K	Correct
0.27708	K	Incorrect
0.306266	K	Incorrect
0.267249	K	Incorrect
0.276807	K	Incorrect
0.326952	K	Incorrect
0.321174	K	Correct
0.312524	K	Correct
0.309031	K	Correct
0.285296	K	Correct
0.268258	K	Incorrect
0.269182	K	Correct
0.360699	K	Correct
0.285932	K	Correct
0.310948	K	Correct
0.256716	L	Correct
0.252516	L	Incorrect
0.216986	L	Incorrect
0.252854	L	Incorrect
0.26515	L	Incorrect
0.25812	L	Incorrect
0.222684	L	Correct
0.275014	L	Incorrect
0.249358	L	Correct
0.288033	L	Correct
0.282103	L	Incorrect
0.223032	L	Incorrect
0.2523	L	Correct
0.268303	L	Correct
0.252444	L	Correct
0.266685	L	Correct
0.261502	L	Correct
0.244672	L	Correct
