# Supplementary material for: Mature parvalbumin interneuron function in prefrontal cortex requires activity during a postnatal sensitive period
Source: eLife. 2022 Dec 28;11:e80324. doi: 10.7554/eLife.80324 (PMC9797185; doi:10.7554/eLife.80324)
Supplement: Figure 2—source data 4. [file elife-80324-fig2-data4.xlsx]

## Sheet: Sheet1
	Frequency	Dev Control	Dev Inhibition
	1-4 Hz	0.5641	0.4063
	4-12 Hz	0.512821	0.5469
	12-40 Hz	0.7179	0.6563
	65 (62-67) Hz	0.67923	0.3125
	65-80 Hz	0.6026	0.375
	90-120 Hz	0.282051	0.4219
	120-200 Hz	0.5769	0.3594
