# Supplementary material for: Mature parvalbumin interneuron function in prefrontal cortex requires activity during a postnatal sensitive period
Source: eLife. 2022 Dec 28;11:e80324. doi: 10.7554/eLife.80324 (PMC9797185; doi:10.7554/eLife.80324)
Supplement: Figure 3—source data 1. [file elife-80324-fig3-data1.xlsx]

## Sheet: IA
	Treatment Group	IA - Trials to Criterion	IA - Latency
	adult inhibition	10	52.7417
	adult inhibition	13	125.048
	adult inhibition	10	134.089
	adult inhibition	10	49.5696
	adult inhibition	9	96.7726
	adult control	10	44.54
	adult control	12	67.0663
	adult control	10	211.816
	adult control	8	125.314
	adult control	15	81.1886

## Sheet: ED Set-Shifting
	Treatment Group	SS - Trials to Criterion	SS - Errors	SS - Per Errors	SS - Random Errors	SS - Latency
	adult inhibition	9	1	100	0	51.042
	adult inhibition	16	5	60	40	28.7566
	adult inhibition	11	3	33.3333	67	46.5265
	adult inhibition	16	5	40	60	103.214
	adult inhibition	9	1	100	0	316.684
	adult control	10	2	100	0	33.2767
	adult control	9	1	100	0	26.2515
	adult control	14	6	50	50	77.2394
	adult control	9	1	100	0	67.2194
	adult control	10	2	100	0	33.6938

## Sheet: IA - Adult viral inj
	Treatment Group	IA - Trials to Criterion	IA - Latency
	adult inhibition	11	19.36
	adult inhibition	10	54.4
	adult inhibition	11	29.9
	adult inhibition	9	31
	adult inhibition	13	46.08
	adult inhibition	10	22.2
	adult inhibition	9	14.89
	adult inhibition	8	29.63
	adult inhibition	23	26.09
	adult inhibition	10	98.8
	adult inhibition	13	36.08
	adult control	9	55.78
	adult control	9	82.11
	adult control	8	46.75
	adult control	8	64.5
	adult control	9	38
	adult control	10	71.67
	adult control	9	16.33
	adult control	17	30.24
	adult control	11	37.55
	adult control	8	44.63
	adult control	9	90.56
	adult control	9	15.44

## Sheet: SS - Adult viral inj
	Treatment Group	SS - Trials to Criterion	SS - Errors	SS - Latency
	adult inhibition	9	1	44.78
	adult inhibition	9	1	74.67
	adult inhibition	8	0	35.43
	adult inhibition	9	1	36
	adult inhibition	13	3	45.77
	adult inhibition	10	2	16.4
	adult inhibition	9	1	27
	adult inhibition	15	6	15.47
	adult inhibition	9	1	19.11
	adult inhibition	12	3	95.58
	adult inhibition	9	1	9.78
	adult control	10	2	48.8
	adult control	8	0	79.13
	adult control	14	4	15.29
	adult control	10	2	34.2
	adult control	8	0	30.75
	adult control	10	2	43
	adult control	13	4	34.23
	adult control	10	2	64.8
	adult control	9	1	27.67
	adult control	10	2	51.3
	adult control	9	1	48.56
	adult control	9	1	16.78
