# Supplementary material for: Mature parvalbumin interneuron function in prefrontal cortex requires activity during a postnatal sensitive period
Source: eLife. 2022 Dec 28;11:e80324. doi: 10.7554/eLife.80324 (PMC9797185; doi:10.7554/eLife.80324)
Supplement: Figure 3—source data 2. [file elife-80324-fig3-data2.xlsx]

## Sheet: Sheet1
Gamma	Animal	Trial Type
0.236362	A	Baseline
0.251911	A	Baseline
0.281726	A	Baseline
0.230111	A	Baseline
0.290189	A	Baseline
0.250489	A	Baseline
0.243231	A	Baseline
0.270925	A	Baseline
0.213478	A	Baseline
0.177842	B	Baseline
0.20684	B	Baseline
0.175122	B	Baseline
0.175474	B	Baseline
0.165782	B	Baseline
0.185935	B	Baseline
0.171204	B	Baseline
0.165676	B	Baseline
0.212769	B	Baseline
0.186966	B	Baseline
0.196403	B	Baseline
0.156657	B	Baseline
0.192659	B	Baseline
0.160722	B	Baseline
0.273588	C	Baseline
0.267409	C	Baseline
0.33234	C	Baseline
0.307044	C	Baseline
0.296562	C	Baseline
0.213774	C	Baseline
0.311576	C	Baseline
0.330054	C	Baseline
0.264058	C	Baseline
0.182925	D	Baseline
0.193618	D	Baseline
0.179532	D	Baseline
0.190647	D	Baseline
0.157935	D	Baseline
0.155764	D	Baseline
0.162202	D	Baseline
0.189242	D	Baseline
0.127778	D	Baseline
0.180609	D	Baseline
0.14039	E	Baseline
0.152867	E	Baseline
0.138604	E	Baseline
0.152445	E	Baseline
0.148999	E	Baseline
0.134226	E	Baseline
0.184249	E	Baseline
0.181857	E	Baseline
0.146211	E	Baseline
0.305157	A	Incorrect
0.209749	A	Correct
0.253833	A	Correct
0.212788	A	Correct
0.257191	A	Incorrect
0.289262	A	Correct
0.277616	A	Correct
0.28763	A	Correct
0.271429	A	Correct
0.216793	B	Incorrect
0.210915	B	Incorrect
0.19276	B	Incorrect
0.202373	B	Incorrect
0.230341	B	Correct
0.161521	B	Incorrect
0.17324	B	Incorrect
0.217735	B	Correct
0.201758	B	Correct
0.241024	B	Correct
0.228986	B	Correct
0.184804	B	Correct
0.244959	B	Correct
0.215052	B	Correct
0.334835	C	Correct
0.317607	C	Correct
0.268315	C	Incorrect
0.42511	C	Correct
0.506875	C	Correct
0.533204	C	Correct
0.348524	C	Correct
0.336701	C	Correct
0.351935	C	Correct
0.179618	D	Incorrect
0.203224	D	Correct
0.232835	D	Correct
0.185324	D	Correct
0.269584	D	Correct
0.155173	D	Incorrect
0.168404	D	Correct
0.291942	D	Correct
0.217187	D	Correct
0.210378	D	Correct
0.156165	E	Incorrect
0.2014	E	Correct
0.136355	E	Correct
0.144422	E	Correct
0.164202	E	Correct
0.154468	E	Correct
0.149277	E	Correct
0.230915	E	Correct
0.140899	E	Correct
