# Supplementary material for: Mature parvalbumin interneuron function in prefrontal cortex requires activity during a postnatal sensitive period
Source: eLife. 2022 Dec 28;11:e80324. doi: 10.7554/eLife.80324 (PMC9797185; doi:10.7554/eLife.80324)
Supplement: Figure 3—source data 3. [file elife-80324-fig3-data3.xlsx]

## Sheet: Sheet1
Gamma	Animal	Trial Type
0.136222	F	Baseline
0.130387	F	Baseline
0.147484	F	Baseline
0.157139	F	Baseline
0.138471	F	Baseline
0.147643	F	Baseline
0.150925	F	Baseline
0.156809	F	Baseline
0.164347	F	Baseline
0.165071	G	Baseline
0.133471	G	Baseline
0.167022	G	Baseline
0.140589	G	Baseline
0.134475	G	Baseline
0.143485	G	Baseline
0.135869	G	Baseline
0.139823	G	Baseline
0.14899	G	Baseline
0.158795	G	Baseline
0.114583	G	Baseline
0.157964	H	Baseline
0.165331	H	Baseline
0.1616	H	Baseline
0.164343	H	Baseline
0.149035	H	Baseline
0.195159	H	Baseline
0.166778	H	Baseline
0.171637	H	Baseline
0.144463	H	Baseline
0.16996	H	Baseline
0.187926	H	Baseline
0.178419	H	Baseline
0.185887	H	Baseline
0.232831	H	Baseline
0.177499	H	Baseline
0.155176	H	Baseline
0.198204	I	Baseline
0.210017	I	Baseline
0.221971	I	Baseline
0.231957	I	Baseline
0.251386	I	Baseline
0.221747	I	Baseline
0.256671	I	Baseline
0.21782	I	Baseline
0.123837	F	Incorrect
0.199206	F	Correct
0.168464	F	Correct
0.162153	F	Correct
0.179793	F	Correct
0.204943	F	Correct
0.178896	F	Correct
0.203154	F	Correct
0.230512	F	Correct
0.123658	G	Incorrect
0.162063	G	Correct
0.225537	G	Correct
0.154606	G	Incorrect
0.151044	G	Incorrect
0.186886	G	Correct
0.152238	G	Correct
0.244694	G	Correct
0.158526	G	Correct
0.149021	G	Correct
0.184183	G	Correct
0.183674	H	Correct
0.249173	H	Incorrect
0.25576	H	Incorrect
0.26995	H	Correct
0.267789	H	Correct
0.229082	H	Incorrect
0.185738	H	Incorrect
0.221612	H	Correct
0.202075	H	Incorrect
0.189153	H	Correct
0.199329	H	Correct
0.202007	H	Correct
0.222813	H	Correct
0.232733	H	Correct
0.267639	H	Correct
0.244119	H	Correct
0.194154	I	Incorrect
0.258617	I	Correct
0.300382	I	Correct
0.263949	I	Correct
0.286675	I	Correct
0.28698	I	Correct
0.352417	I	Correct
0.276178	I	Correct
