# Supplementary material for: Mature parvalbumin interneuron function in prefrontal cortex requires activity during a postnatal sensitive period
Source: eLife. 2022 Dec 28;11:e80324. doi: 10.7554/eLife.80324 (PMC9797185; doi:10.7554/eLife.80324)
Supplement: Figure 3—source data 4. [file elife-80324-fig3-data4.xlsx]

## Sheet: Sheet1
	Frequency	Adult Control	Adult Inhib
	65 Hz	0.6429	0.6765
