# Supplementary material for: Mature parvalbumin interneuron function in prefrontal cortex requires activity during a postnatal sensitive period
Source: eLife. 2022 Dec 28;11:e80324. doi: 10.7554/eLife.80324 (PMC9797185; doi:10.7554/eLife.80324)
Supplement: Figure 4—source data 1. [file elife-80324-fig4-data1.xlsx]

## Sheet: le-IPSC
	Treatment	le-IPSC Amplitude (pA)
	dev inhibition	2413.94
	dev inhibition	315.552
	dev inhibition	1442.87
	dev inhibition	1828
	dev inhibition	2952.27
	dev inhibition	949.707
	dev inhibition	970.459
	dev inhibition	330.811
	dev inhibition	46.997
	dev inhibition	1102.9
	dev inhibition	0
	dev inhibition	1710.2
	dev inhibition	1379.39
	dev inhibition	293.579
	dev inhibition	1960.45
	dev inhibition	574.951
	dev inhibition	1130.98
	dev control	824.585
	dev control	0
	dev control	1528.32
	dev control	1824.34
	dev control	1288.45
	dev control	1757.2
	dev control	3081.05
	dev control	3496.7
	dev control	3612.06
	dev control	1356.81
	dev control	3483.89

## Sheet: sIPSC
	Treatment	sIPSC Frequency (Hz)	sIPSC Amplitude (pA)
	dev inhibition	2.11667	42.0229
	dev inhibition	3.13333	32.959
	dev inhibition	5.4	53.9483
	dev inhibition	3.58333	54.8209
	dev inhibition	4.91667	65.0097
	dev inhibition	4.36667	50.3959
	dev inhibition	4.31667	49.3819
	dev inhibition	1.38333	41.2833
	dev inhibition	3.45	57.4704
	dev inhibition	3.18333	41.2546
	dev inhibition	1.15	38.8679
	dev inhibition	3.63333	50.606
	dev inhibition	1.98333	51.9825
	dev inhibition	4.65	76.9568
	dev inhibition	5.75	49.1696
	dev inhibition	2.06667	39.0773
	dev inhibition	2.21667	61.104
	dev control	4.03333	58.3542
	dev control	2.4	47.3319
	dev control	6.3	52.9278
	dev control	5.45	59.5382
	dev control	5.55	30.4553
	dev control	7.18333	42.0165
	dev control	5.48333	58.3006
	dev control	7.08333	97.4222
	dev control	3.7	53.5955
	dev control	4.11667	48.3858
	dev control	3.91667	24.1361
	dev control	2.48333	24.6434
