# Supplementary material for: Mature parvalbumin interneuron function in prefrontal cortex requires activity during a postnatal sensitive period
Source: eLife. 2022 Dec 28;11:e80324. doi: 10.7554/eLife.80324 (PMC9797185; doi:10.7554/eLife.80324)
Supplement: Figure 5—source data 1. [file elife-80324-fig5-data1.xlsx]

## Sheet: ED Set-Shifting
	Treatment Group	SS - Trials to Criterion OFF	SS - Trials to Criterion ON	SS - Errors OFF	SS - Errors ON
	dev control	13	9	4	1
	dev control	9	10	1	2
	dev control	10	13	2	4
	dev control	10	10	2	2
	dev control	9	8	1	0
	dev inhibition	10	8	2	0
	dev inhibition	14	10	4	2
	dev inhibition	15	10	5	2
	dev inhibition	18	13	6	4
	dev inhibition	15	9	5	1
	dev inhibition	21	13	9	5
