# Supplementary material for: Mature parvalbumin interneuron function in prefrontal cortex requires activity during a postnatal sensitive period
Source: eLife. 2022 Dec 28;11:e80324. doi: 10.7554/eLife.80324 (PMC9797185; doi:10.7554/eLife.80324)
Supplement: Figure 5—source data 2. [file elife-80324-fig5-data2.xlsx]

## Sheet: Sheet1
Gamma	Animal	Trial Type
0.218737	F	Baseline
0.201722	F	Baseline
0.217627	F	Baseline
0.185753	F	Baseline
0.220346	F	Baseline
0.183312	F	Baseline
0.191848	F	Baseline
0.273908	F	Baseline
0.166638	F	Baseline
0.183378	F	Baseline
0.185064	F	Baseline
0.219901	F	Baseline
0.211014	F	Baseline
0.166406	F	Baseline
0.208499	F	Baseline
0.211156	G	Baseline
0.189084	G	Baseline
0.191257	G	Baseline
0.178092	G	Baseline
0.186222	G	Baseline
0.220172	G	Baseline
0.228822	G	Baseline
0.214351	G	Baseline
0.241057	G	Baseline
0.186623	G	Baseline
0.222442	G	Baseline
0.192409	G	Baseline
0.159392	G	Baseline
0.186025	G	Baseline
0.182945	G	Baseline
0.170284	G	Baseline
0.180377	G	Baseline
0.155317	H	Baseline
0.185797	H	Baseline
0.163907	H	Baseline
0.190016	H	Baseline
0.157706	H	Baseline
0.156093	H	Baseline
0.146972	H	Baseline
0.180033	H	Baseline
0.174596	H	Baseline
0.153447	H	Baseline
0.18125	H	Baseline
0.179367	H	Baseline
0.184913	H	Baseline
0.167654	H	Baseline
0.152867	H	Baseline
0.293565	I	Baseline
0.349676	I	Baseline
0.223412	I	Baseline
0.222419	I	Baseline
0.334924	I	Baseline
0.202648	I	Baseline
0.265636	I	Baseline
0.269188	I	Baseline
0.237429	I	Baseline
0.234262	I	Baseline
0.192642	J	Baseline
0.163418	J	Baseline
0.143944	J	Baseline
0.171929	J	Baseline
0.157854	J	Baseline
0.168735	J	Baseline
0.160766	J	Baseline
0.155112	J	Baseline
0.186847	J	Baseline
0.170992	J	Baseline
0.169419	J	Baseline
0.166625	J	Baseline
0.189642	J	Baseline
0.155069	J	Baseline
0.159804	J	Baseline
0.201869	J	Baseline
0.172407	J	Baseline
0.194294	J	Baseline
0.159298	J	Baseline
0.157874	J	Baseline
0.163117	J	Baseline
0.242471	K	Baseline
0.199322	K	Baseline
0.203205	K	Baseline
0.200659	K	Baseline
0.195263	K	Baseline
0.216102	K	Baseline
0.206182	K	Baseline
0.212004	K	Baseline
0.20351	K	Baseline
0.21672	K	Baseline
0.261682	K	Baseline
0.237149	K	Baseline
0.261979	K	Baseline
0.247932	K	Baseline
0.202324	F	Incorrect
0.227676	F	Correct
0.230195	F	Correct
0.27402	F	Incorrect
0.199098	F	Incorrect
0.200726	F	Correct
0.164341	F	Incorrect
0.149418	F	Correct
0.221754	F	Incorrect
0.352621	F	Correct
0.175645	F	Correct
0.215981	F	Correct
0.173512	F	Correct
0.177124	F	Correct
0.197554	F	Correct
0.174586	G	Incorrect
0.205084	G	Incorrect
0.183795	G	Correct
0.190969	G	Correct
0.162873	G	Incorrect
0.197622	G	Correct
0.183274	G	Incorrect
0.247824	G	Correct
0.24147	G	Correct
0.192624	G	Incorrect
0.198533	G	Incorrect
0.230626	G	Correct
0.182239	G	Correct
0.211049	G	Correct
0.291379	G	Correct
0.331556	G	Correct
0.194462	G	Correct
0.189423	H	Incorrect
0.210901	H	Correct
0.173077	H	Incorrect
0.207949	H	Correct
0.17578	H	Incorrect
0.186344	H	Incorrect
0.158743	H	Correct
0.206375	H	Incorrect
0.164061	H	Correct
0.162023	H	Correct
0.155889	H	Correct
0.190409	H	Correct
0.18355	H	Correct
0.135674	H	Correct
0.160616	H	Correct
0.220879	I	Incorrect
0.242943	I	Correct
0.267707	I	Incorrect
0.274521	I	Correct
0.203236	I	Correct
0.245293	I	Correct
0.218731	I	Correct
0.204434	I	Correct
0.252797	I	Correct
0.267638	I	Correct
0.210069	J	Correct
0.174776	J	Incorrect
0.214469	J	Incorrect
0.189741	J	Incorrect
0.203032	J	Correct
0.204436	J	Correct
0.207344	J	Incorrect
0.166944	J	Incorrect
0.176279	J	Correct
0.167648	J	Incorrect
0.15352	J	Incorrect
0.219645	J	Correct
0.241988	J	Correct
0.249051	J	Correct
0.1651	J	Incorrect
0.235608	J	Correct
0.247664	J	Correct
0.183966	J	Incorrect
0.18336	J	Correct
0.199132	J	Correct
0.193071	J	Correct
0.203137	K	Incorrect
0.185958	K	Correct
0.205967	K	Correct
0.176874	K	Incorrect
0.210162	K	Incorrect
0.190628	K	Incorrect
0.207138	K	Correct
0.178938	K	Correct
0.205874	K	Correct
0.205575	K	Correct
0.194994	K	Correct
0.186785	K	Correct
0.207553	K	Correct
0.272255	K	Correct
