# Supplementary material for: Mature parvalbumin interneuron function in prefrontal cortex requires activity during a postnatal sensitive period
Source: eLife. 2022 Dec 28;11:e80324. doi: 10.7554/eLife.80324 (PMC9797185; doi:10.7554/eLife.80324)
Supplement: Figure 5—source data 3. [file elife-80324-fig5-data3.xlsx]

## Sheet: Sheet1
Gamma	Animal	Trial Type
0.208363	F	Baseline
0.182867	F	Baseline
0.189332	F	Baseline
0.160669	F	Baseline
0.20592	F	Baseline
0.207742	F	Baseline
0.174243	F	Baseline
0.19766	F	Baseline
0.166863	F	Baseline
0.208383	F	Baseline
0.171371	G	Baseline
0.236817	G	Baseline
0.207934	G	Baseline
0.236067	G	Baseline
0.217279	G	Baseline
0.170956	G	Baseline
0.243728	G	Baseline
0.240205	G	Baseline
0.18063	G	Baseline
0.219999	G	Baseline
0.179766	G	Baseline
0.242507	G	Baseline
0.208176	G	Baseline
0.157103	H	Baseline
0.148503	H	Baseline
0.184488	H	Baseline
0.177274	H	Baseline
0.158512	H	Baseline
0.306551	H	Baseline
0.153196	H	Baseline
0.151075	H	Baseline
0.13351	H	Baseline
0.302582	I	Baseline
0.300696	I	Baseline
0.235098	I	Baseline
0.291796	I	Baseline
0.214715	I	Baseline
0.253447	I	Baseline
0.237062	I	Baseline
0.264465	I	Baseline
0.177591	J	Baseline
0.183795	J	Baseline
0.1952	J	Baseline
0.183933	J	Baseline
0.171213	J	Baseline
0.198948	J	Baseline
0.175531	J	Baseline
0.159809	J	Baseline
0.141779	J	Baseline
0.182953	J	Baseline
0.184043	J	Baseline
0.178141	J	Baseline
0.194149	J	Baseline
0.227975	K	Baseline
0.265255	K	Baseline
0.308245	K	Baseline
0.28249	K	Baseline
0.269787	K	Baseline
0.288681	K	Baseline
0.251815	K	Baseline
0.305466	K	Baseline
0.262189	K	Baseline
0.253596	K	Baseline
0.244265	F	Correct
0.173675	F	Correct
0.212342	F	Incorrect
0.193352	F	Correct
0.214379	F	Correct
0.167181	F	Correct
0.201683	F	Correct
0.13613	F	Incorrect
0.196772	F	Correct
0.235532	F	Correct
0.184099	G	Incorrect
0.172808	G	Correct
0.170364	G	Incorrect
0.304722	G	Correct
0.237044	G	Correct
0.249401	G	Incorrect
0.230918	G	Correct
0.190912	G	Correct
0.193274	G	Correct
0.299429	G	Correct
0.198502	G	Incorrect
0.236412	G	Correct
0.230018	G	Correct
0.160416	H	Correct
0.154042	H	Correct
0.163505	H	Correct
0.157066	H	Correct
0.163813	H	Correct
0.164462	H	Incorrect
0.158367	H	Correct
0.186541	H	Correct
0.178044	H	Correct
0.290809	I	Correct
0.301741	I	Correct
0.481954	I	Correct
0.266978	I	Correct
0.31123	I	Correct
0.376326	I	Correct
0.387776	I	Correct
0.491693	I	Correct
0.151249	J	Incorrect
0.178829	J	Incorrect
0.218127	J	Incorrect
0.194651	J	Correct
0.16175	J	Correct
0.166365	J	Correct
0.182278	J	Correct
0.165549	J	Incorrect
0.17223	J	Correct
0.168159	J	Correct
0.183402	J	Incorrect
0.181596	J	Correct
0.193515	J	Correct
0.240552	K	Incorrect
0.308581	K	Correct
0.303798	K	Correct
0.228918	K	Correct
0.281659	K	Correct
0.260854	K	Incorrect
0.268789	K	Correct
0.31898	K	Correct
0.22169	K	Correct
0.257736	K	Correct
